# Supplementary material for: Silver–Gold Alloy Nanoparticles (AgAu NPs): Photochemical Synthesis of Novel Biocompatible, Bimetallic Alloy Nanoparticles and Study of Their In Vitro Peroxidase Nanozyme Activity
Source: MDPI journal article supplement (doi:10.3390/nano13172471), 2023-09-01
Supplement: s1 [file s1]

## Supplementary material

# Silver–Gold Alloy Nanoparticles (AgAu NPs): Photochemical Synthesis of Novel Biocompatible, Bimetallic Alloy Nanoparticles and Study of Their In Vitro Peroxidase Nanozyme Activity

Prakash G. Kshirsagar <sup>1,\*</sup>, Valeria De Matteis <sup>2</sup>, Sudipto Pal <sup>3</sup> and Shiv Shankar Sangaru <sup>4,\*</sup>

<sup>1</sup> Department of Biochemistry and Molecular Biology, University of Nebraska Medical Center, Omaha, NE 68198, USA

<sup>2</sup> Department of Mathematics and Physics “Ennio De Giorgi”, University of Salento, Via Arnesano, 73100 Lecce, Italy

<sup>3</sup> Department of Innovation Engineering, University of Salento, Via Per Monteroni, 73100 Lecce, Italy

<sup>4</sup> Saudi Aramco, Dhahran 31311, Saudi Arabia

\* Correspondence: prakash.kshirsagar@unmc.edu (P.G.K.); shiv.sangaru@aramco.com (S.S.S.); Tel.: +1-40-2514-7245 (P.G.K.); +966-513-873-3465 (S.S.S.)

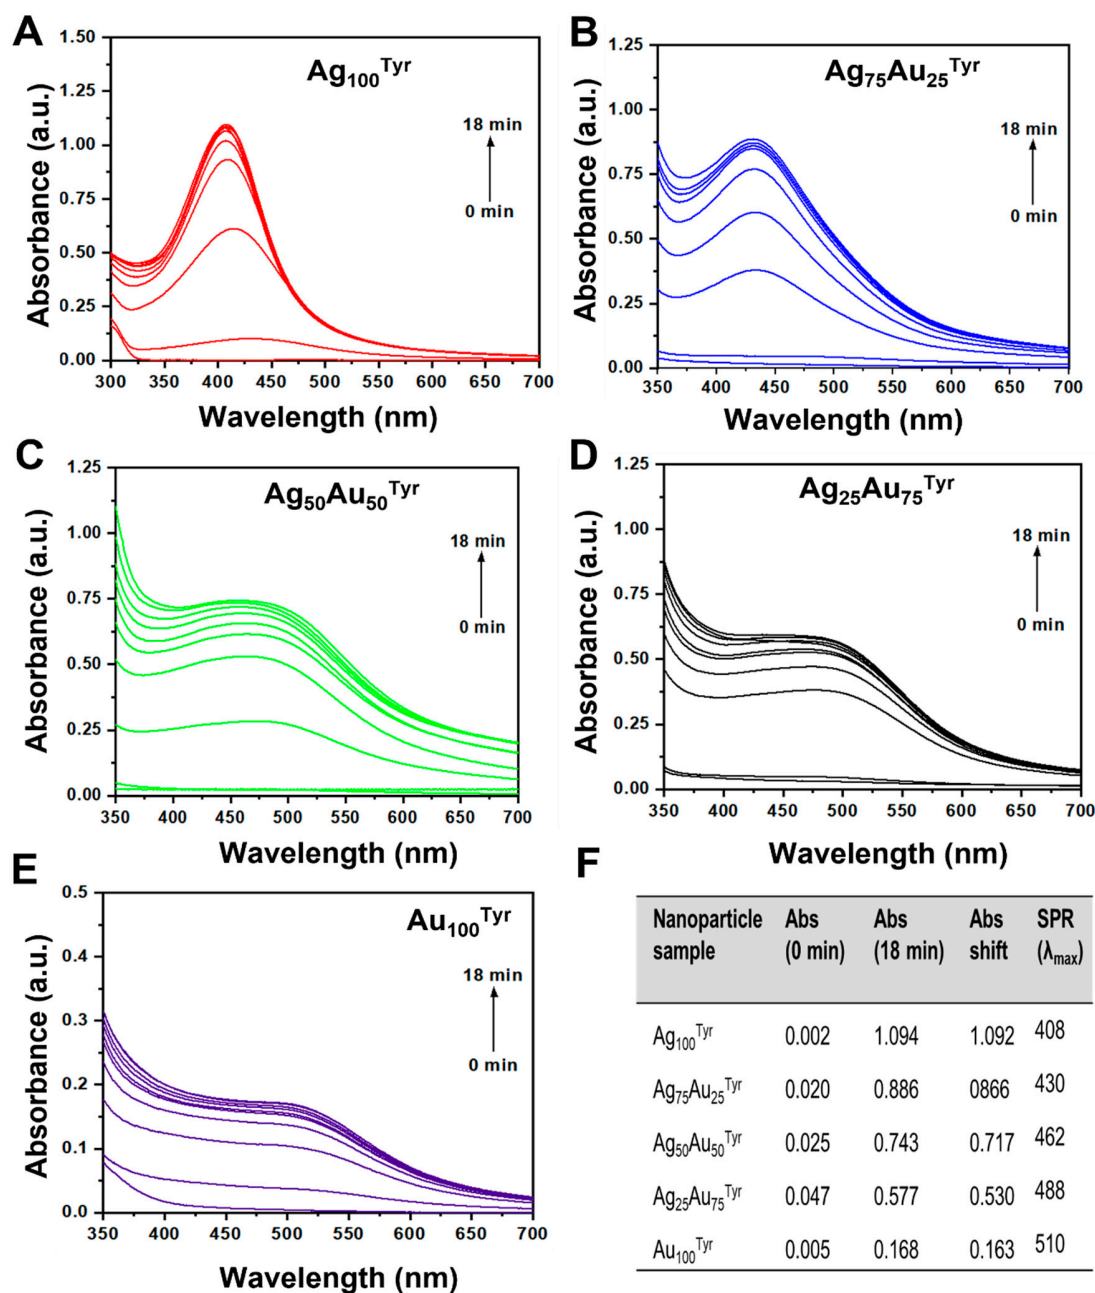

**Figure S1. Time dependent UV visible spectra of Tyrosine-reduced mono/bimetallic NPs.** UV visible absorption spectra of mono and bi-metallic NPs during 0-18 min time span. (A)  $\text{Ag}_{100}^{\text{Tyr}}$ , (B)  $\text{Au}_{75}\text{Au}_{25}^{\text{Tyr}}$ , (C)  $\text{Au}_{50}\text{Au}_{50}^{\text{Tyr}}$ , (D)  $\text{Ag}_{25}\text{Au}_{75}^{\text{Tyr}}$ , (E)  $\text{Au}_{100}^{\text{Tyr}}$ , (F) Table summarizing results of the time-dependent UV visible study.

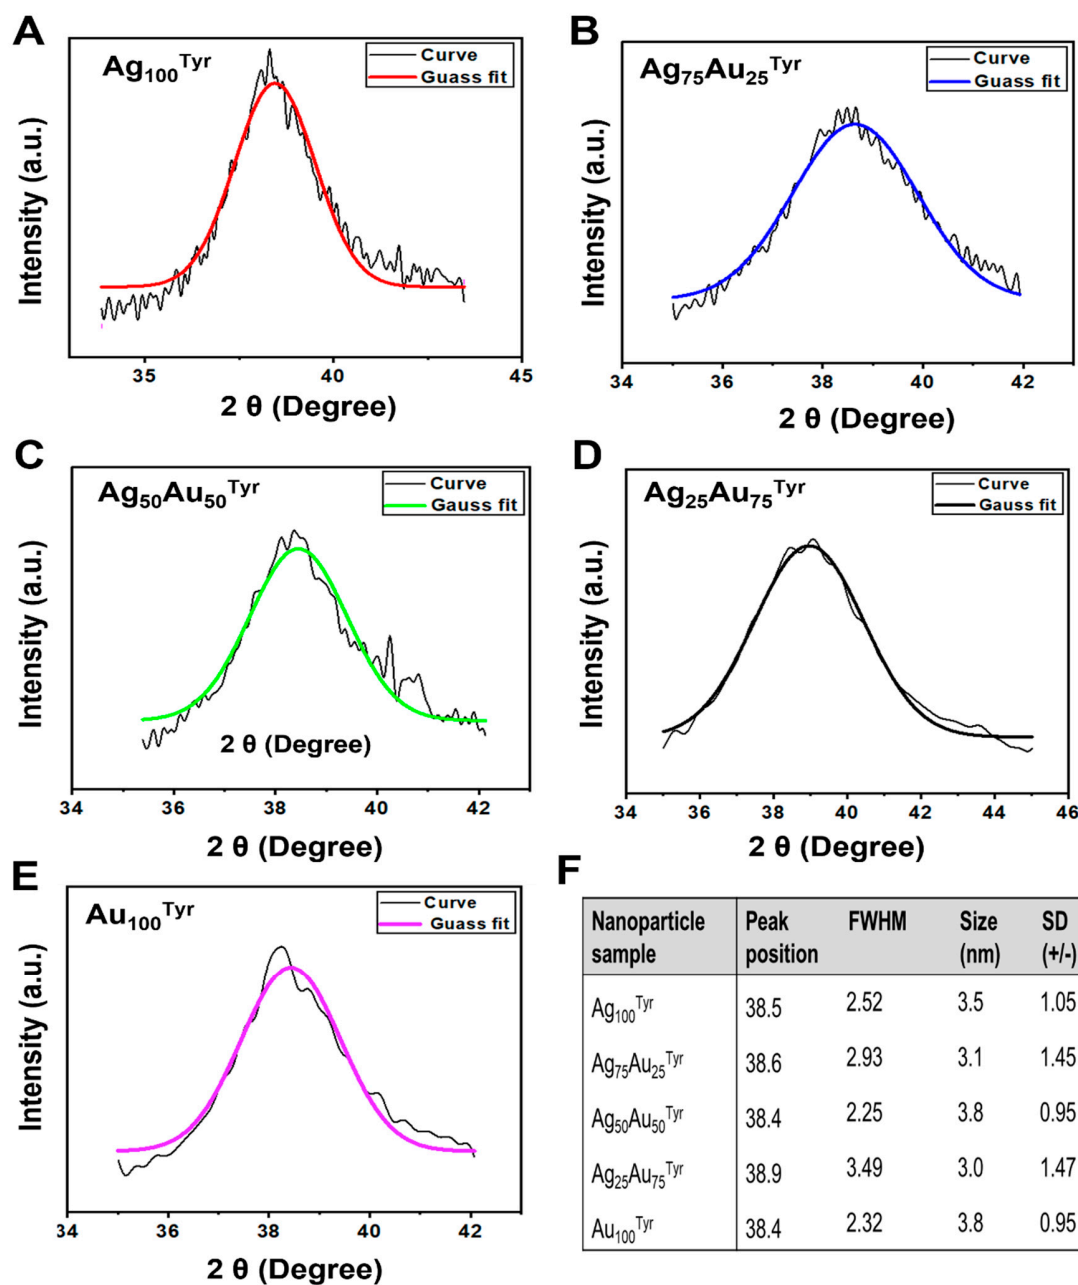

**Figure S2. Nanoparticle size determined by the XRD.** The nanoparticle diameter (nano-crystal grain size) determined by the Scherrer equation (i.e., fit the XRD peaks and determined the FWHM [2 $\theta$ ] by Gaussian curve fitting). **(A)**  $\text{Ag}_{100}^{\text{Tyr}}$ , **(B)**  $\text{Au}_{75}\text{Au}_{25}^{\text{Tyr}}$ , **(C)**  $\text{Au}_{50}\text{Au}_{50}^{\text{Tyr}}$ , **(D)**  $\text{Ag}_{25}\text{Au}_{75}^{\text{Tyr}}$ , **(E)**  $\text{Au}_{100}^{\text{Tyr}}$ , **(F)** Table summarizing results from the XRD study.

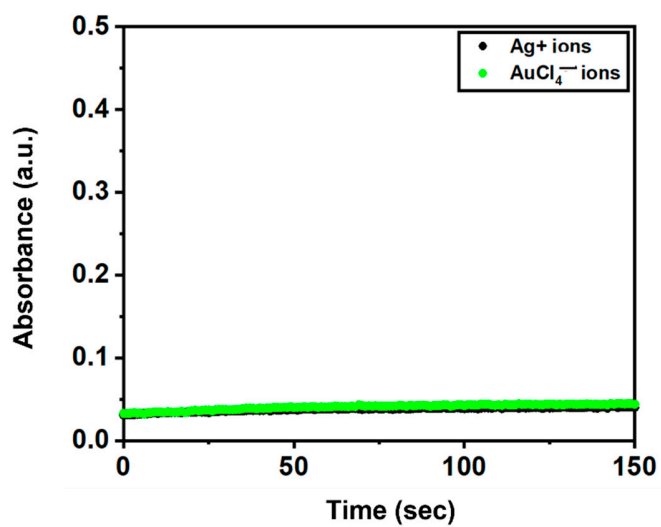

**Figure S3.** The in vitro peroxidase mimicking activity determined for the Ag<sup>+</sup>, and AuCl<sub>4</sub><sup>-</sup> (i.e., control ions).
